# Supplementary material for: Prediction of 2D ferromagnetism and monovalent europium ions in the\n EuBr/graphene heterojunctions
Source: Royal Society of Chemistry journal article supplement (doi:10.1039/d1cp02218k), 2021-07-16
Supplement: d1cp02218k1.pdf [file d1cp02218k1.pdf]

## Supporting Information

### **Prediction of 2D ferromagnetism and monovalent europium ions in the EuBr/graphene heterojunctions**

Haoyi Tan,<sup>a</sup> Guangcun Shan,<sup>ab,\*</sup> Gianfranco Pacchioni<sup>c</sup>

<sup>a</sup> School of Instrumentation Science and Opto-electronics Engineering & Institute of Precision Instrument and Quantum Sensing, Beihang University, Beijing 100191, China.

<sup>b</sup> Department of Materials Science and Engineering, City University of Hong Kong, Kowloon Tong, Hong Kong SAR.

<sup>c</sup> Dipartimento di Scienza dei Materiali, Università degli Studi Milano-Bicocca, 20125 Milano, Italy

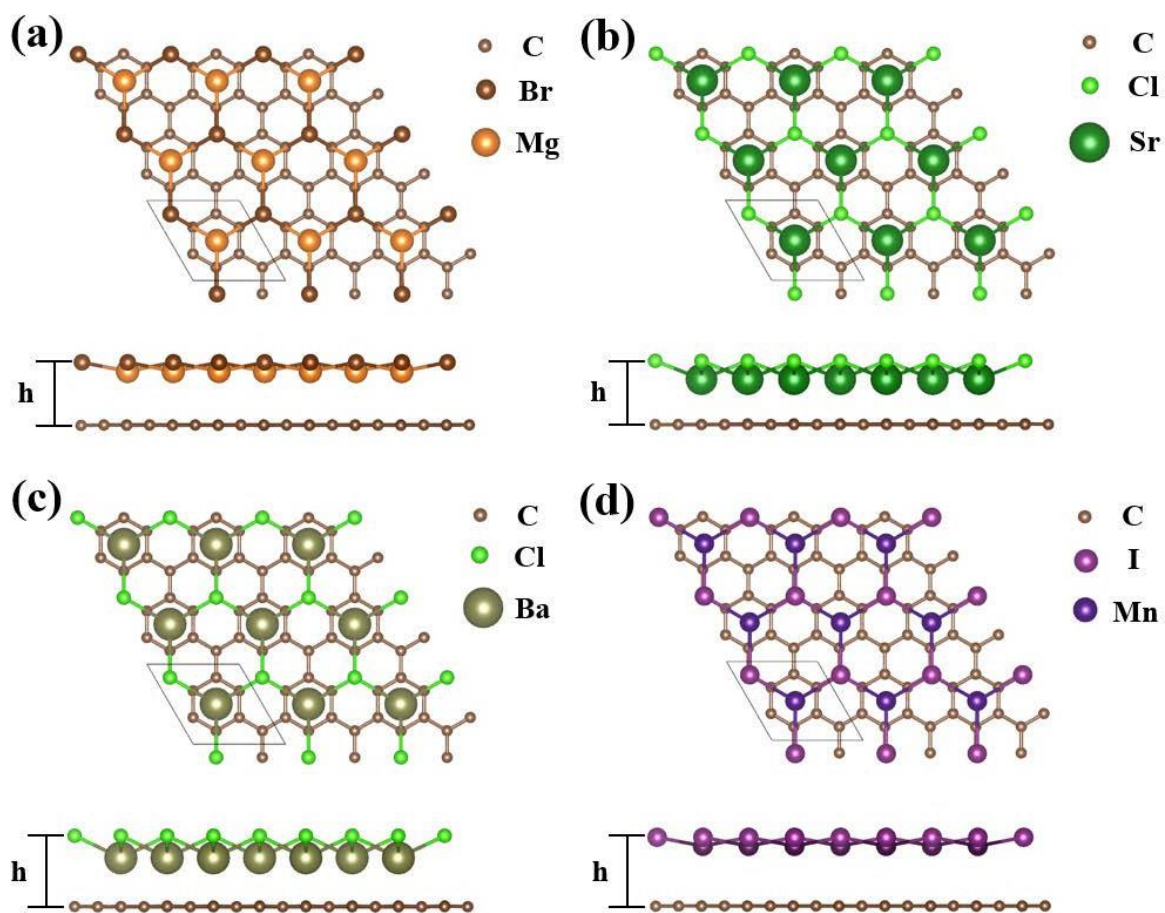

**Figure S1. Geometric structures of 3×3 supercells of (a) MgBr/graphene heterojunctions, (b) SrCl/graphene heterojunctions, (c) BaCl/graphene heterojunctions and (d) MnI/graphene heterojunctions.**

**Table S1. Lattice constants, bond length, h, cohesive energy and heterojunction formation energy of different heterojunctions and isolated crystals.**

| Materials                        | Lattice Constants<br>a=b (nm) | Bond Length of<br>Metal Halide<br>(nm) | h<br>(nm) | Cohesive Energy<br>(eV/atom) | Heterojunction<br>Formation Energy<br>(eV/atom) |
|----------------------------------|-------------------------------|----------------------------------------|-----------|------------------------------|-------------------------------------------------|
| MgBr/graphene<br>heterojunctions | 0.493                         | 0.288                                  | 0.340     | 6.76                         | 0.019                                           |
| Isolated MgBr crystals           | 0.369                         | 0.268                                  | \         | 2.09                         | \                                               |
| SrCl/graphene<br>heterojunctions | 0.496                         | 0.303                                  | 0.344     | 7.05                         | 0.081                                           |
| Isolated SrCl crystals           | 0.429                         | 0.293                                  | \         | 3.08                         | \                                               |
| BaCl/graphene<br>heterojunctions | 0.497                         | 0.311                                  | 0.381     | 7.10                         | 0.104                                           |
| Isolated BaCl crystals           | 0.472                         | 0.308                                  | \         | 3.21                         | \                                               |
| MnI/graphene<br>heterojunctions  | 0.491                         | 0.287                                  | 0.372     | 6.78                         | 0.408                                           |
| Isolated MnI crystals            | 0.409                         | 0.273                                  | \         | 1.97                         | \                                               |

**Table S2. Energy and magnetic moment of 2×2 supercells of MnI/graphene heterojunctions with different magnetic configurations.**

| Magnetic Configurations | Energy (eV) | Magnetic Moment ( $\mu_B$ ) |
|-------------------------|-------------|-----------------------------|
| FM                      | -331.85749  | 17.8                        |
| AFM1                    | -332.30736  | 0.0                         |
| AFM2                    | -332.30792  | 0.0                         |
| AFM3                    | -332.31102  | 0.0                         |
| FIM                     | -332.13208  | 8.4                         |

**Table S3. Energy of 2×2 supercells of EuBr/graphene heterojunction with different Hubbard on-site Coulomb potential set for Eu.**

| U-J | FM (eV)    | AFM1 (eV)  | AFM2 (eV)  | AFM3 (eV)  | FIM (eV)   |
|-----|------------|------------|------------|------------|------------|
| 4.0 | -358.59578 | -358.59003 | -358.59003 | -358.59003 | -358.59122 |
| 8.0 | -357.92893 | -357.90797 | -357.90797 | -357.90797 | -357.91293 |

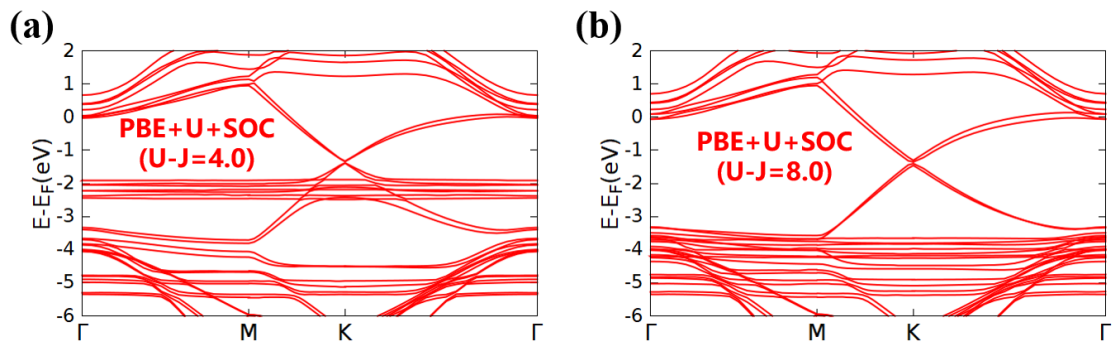

**Figure S2. Band structure of EuBr/graphene heterojunctions with different Hubbard on-site Coulomb potential set for Eu ions of (a)  $U-J = 4.0$  and (b)  $U-J = 8.0$ .**
